# Supplementary material for: The m6A demethylase ALKBH5 controls trophoblast invasion at the maternal-fetal interface by regulating the stability of CYR61 mRNA
Source: PubMed Central journal article supplement — Theranostics. 2019 May 31;9(13):3853–65. doi: 10.7150/thno.31868 (PMC6587351; doi:10.7150/thno.31868), 2019-05-31
Supplement: thnov09p3853s1.pdf [file thnov09p3853s1.pdf]

## **Supplementary Materials and Methods**

### ***Western Blotting***

Trophoblasts were washed twice with ice-cold PBS and proteins were isolated using 1% Triton X-100 reagent (Sigma-Aldrich; Merck, Germany) on ice. The lysate was centrifuged at 12000 rpm/min at 4 °C for 25 min. The supernatant was obtained, and the protein concentration was detected using a BCA kit (Pierce, Rockford, IL, USA). Equal amounts of protein were subjected to 10% SDS polyacrylamide gel electrophoresis, followed by electrotransferring onto PVDF membranes (Pall Corporation, Ann Arbor, MI, USA). Then, 5% fat-free milk powder in TBS with 0.1% tween-20 (Sigma-Aldrich; Merck, Germany) was used to block the PVDF membranes for 1 h. Antibodies recognizing ALKBH5 (Novus, NBP1-82188) and CYR61 (Abcam, ab24448) were used to perform western blot analysis using standard techniques. GAPDH (Abcam, ab181602) was detected as loading control.

### ***Total RNA methylation quantification***

Total RNA methylation were quantified using the EpiGentek (EpiQuik m<sup>6</sup>A RNA Methylation Quantification Kit; #P-9005) according to the manufacturer's instructions. In this experiment, abundance of m<sup>6</sup>A marks was quantified by absorbance and reported as relative values to the negative and positive controls, an RNA containing no m<sup>6</sup>A and an m<sup>6</sup>A oligo normalized to have 100% of m<sup>6</sup>A. The global m<sup>6</sup>A level in RNA was determined in 200 ng aliquots of total RNA extracted from recurrent miscarriage patients and healthy controls. Total RNA samples were then normalized against the total amount (ng) of RNA loaded. All assays were performed in triplicate and biological replicates were completed at least three times.

### ***Immunohistochemistry***

Immunohistochemical staining was performed as previously described [1]. In brief, tissue slides were deparaffinized and rehydrated. Endogenous peroxidase activity was blocked with 0.3% hydrogen peroxide for 20 min. Slides were blocked with 5% FBS for 30 min and incubated with rabbit anti-ALKBH5 (dilution 1:100, Novus, NBP1-82188) at 4°C overnight.

After washing in PBS, the sections were incubated with biotinylated secondary antibody and stained by using a Mouse and Rabbit Specific HRP/DAB IHC Detection Kit (ab236466, Abcam, Cambridge, MA, USA). Meyer's hematoxylin (Sigma-Aldrich, St. Louis, MO) was used as a counterstain dye. A negative control was obtained by replacing the primary antibody with PBS. Images were captured with the Leica microscope (Leica, Buffalo Grove, IL).

### ***Luciferase reporter assay***

Luciferase reporters were generated by cloning 3'UTR of CYR61 or 3'UTR of CYR61 (mutant A to T) RNA into psiCHECK2 (Promega Corporation, USA). Then, HTR-8 cells ( $2.5 \times 10^4$  in each well of 24-well plate) were cotransfected with 150 ng of renilla reporters and siALKBH5 or siCtrl, with 1.5  $\mu$ L of the jetPRIME reagent. HTR-8 cells lysates were harvested 24 h after transfection. Luciferase activities were detected using the Dual-Luciferase® Reporter Assay System (Promega) according to manufacturer's protocol.

### ***Invasion Assay***

We evaluated the invasive ability of trophoblasts objectively across the extracellular matrix (ECM) using the Transwell Matrigel invasion assay, as previously described for trophoblasts [2]. In brief, cell culture inserts (pore size, 8  $\mu$ m; diameter, 6.5 mm; Corning) were coated with 25  $\mu$ L of Matrigel™ (Corning, New York, USA) and placed in a 24-well plate. Two sets of invasion assays were performed: HTR-8 cells were transfected with siCtrl, siALKBH5, siCYR61, control vector, CYR61 or the ALKBH5 expressing-vector and cultured for 48 hour. Then,  $1.2 \times 10^5$  cells/200  $\mu$ L of DMEM were placed into the upper chamber of each insert. The lower chambers were filled with 800  $\mu$ L of DMEM containing 15% FBS, and the cells were incubated at 37°C for 48 hour. The inserts were removed, washed in ice-cold PBS, and the non-invading cells, together with the ECM, were removed from the upper surface of the filter by wiping with a cotton bud. The cells on the lower surface of the inserts were fixed in 4% paraformaldehyde, stained with crystal violet, and observed using an inverted phase-contrast microscope (Leica). The number of cells that had invaded the lower surface was counted at a magnification of  $\times 200$ . To eliminate individual variability, the results were assessed by two independent researchers, and the invasive index was calculated as the proportion of the

invading cells in each experimental group expressed relative to the appropriate control cells. Each experiment was performed in duplicate and the experiments were independently repeated three times.

### ***Library preparation for ALKBH5 knockdown Transcriptome sequencing***

A total amount of 3 µg RNA per sample was used as input material for the RNA sample preparations. Sequencing libraries were generated using NEBNext® Ultra™ RNA Library Prep Kit for Illumina® (NEB, USA) following manufacturer's recommendations and index codes were added to attribute sequences to each sample. Briefly, mRNA was purified from total RNA using poly-T oligo-attached magnetic beads. Fragmentation was carried out using divalent cations under elevated temperature in NEB Next First Strand Synthesis Reaction Buffer (5X). First strand cDNA was synthesized using random hexamer primer and M-MuLV Reverse Transcriptase (RNase H-). Second strand cDNA synthesis was subsequently performed using DNA polymerase I and RNase H. Remaining overhangs were converted into blunt ends via exonuclease/polymerase activities. After adenylation of 3'ends of DNA fragments, NEB Next Adaptor with hairpin loop structure were ligated to prepare for hybridization. In order to select cDNA fragments of preferentially 250~300 bp in length, the library fragments were purified with AMPure XP system (Beckman Coulter, Beverly, USA). Then 3 µl USER Enzyme (NEB, USA) was used with size-selected, adaptor-ligated cDNA at 37°C for 15 min followed by 5 min at 95 °C before PCR. Then PCR was performed with Phusion High-Fidelity DNA polymerase, Universal PCR primers and Index (X) Primer. At last, PCR products were purified (AMPure XP system) and library quality was assessed on the Agilent Bioanalyzer 2100 system.

### ***Clustering and sequencing***

The clustering of the index-coded samples was performed on a cBot Cluster Generation System using TruSeq PE Cluster Kit v3-cBot-HS (Illumia) according to the manufacturer's instructions. After cluster generation, the library preparations were sequenced on an Illumina platform and 125 bp/150 bp paired-end reads were generated.

### ***Quality control***

Raw data (raw reads) of fastq format were firstly processed through in-house perl scripts. In this step, clean data (clean reads) were obtained by removing reads containing adapter, reads containing ploy-N and low quality reads from raw data. At the same time, Q20, Q30 and GC content the clean data were calculated. All the downstream analyses were based on the clean data with high quality.

### ***Reads mapping to the reference genome***

Reference genome and gene model annotation files were downloaded from genome website directly. Index of the reference genome was built using Hisat2 (v2.0.5) and paired-end clean reads were aligned to the reference genome using Hisat2 (v2.0.5). We selected Hisat2 as the mapping tool for that Hisat2 can generate a database of splice junctions based on the gene model annotation file and thus a better mapping result than other non-splice mapping tools.

### ***Quantification of gene expression level***

FeatureCountsv1.5.0-p3 was used to count the reads numbers mapped to each gene. And then FPKM of each gene was calculated based on the length of the gene and reads count mapped to this gene. FPKM, expected number of Fragments Per Kilobase of transcript sequence per Millions base pairs sequenced, considers the effect of sequencing depth and gene length for the reads count at the same time, and is currently the most commonly used method for estimating gene expression levels.

### ***Differential expression analysis***

Differential expression analysis of two conditions/groups (two biological replicates per condition) was performed using the DESeq<sup>2</sup> R package (1.16.1). DESeq2 provide statistical routines for determining differential expression in digital gene expression data using a model based on the negative binomial distribution. The resulting *P*-values were adjusted using the Benjamini and Hochberg's approach for controlling the false discovery rate. Genes with an adjusted *P*-value < 0.05 found by DESeq<sup>2</sup> were assigned as differentially expressed.

Prior to differential gene expression analysis, for each sequenced library, the read counts were adjusted by edgeR program package through one scaling normalized factor. Differential expression analysis of two conditions was performed using the edgeR R package (3.18.1).

The *P* values were adjusted using the Benjamini & Hochberg method. Corrected *P*-value of 0.05 and absolute fold change of 2 were set as the threshold for significantly differential expression.

#### **References:**

1. Tian FJ, He XY, Wang J, Li X, Ma XL, Wu F, et al. Elevated Tristetraprolin Impairs Trophoblast Invasion in Women with Recurrent Miscarriage by Destabilization of HOTAIR. *Mol Ther Nucleic Acids*. 2018;12:600-609.
2. Zhang Y, Jin F, Li XC, Shen FJ, Ma XL, Wu F, et al. The YY1-HOTAIR-MMP2 Signaling Axis Controls Trophoblast Invasion at the Maternal-Fetal Interface. *Mol Ther*. 2017;25: 2394-2403.

## Supplementary data

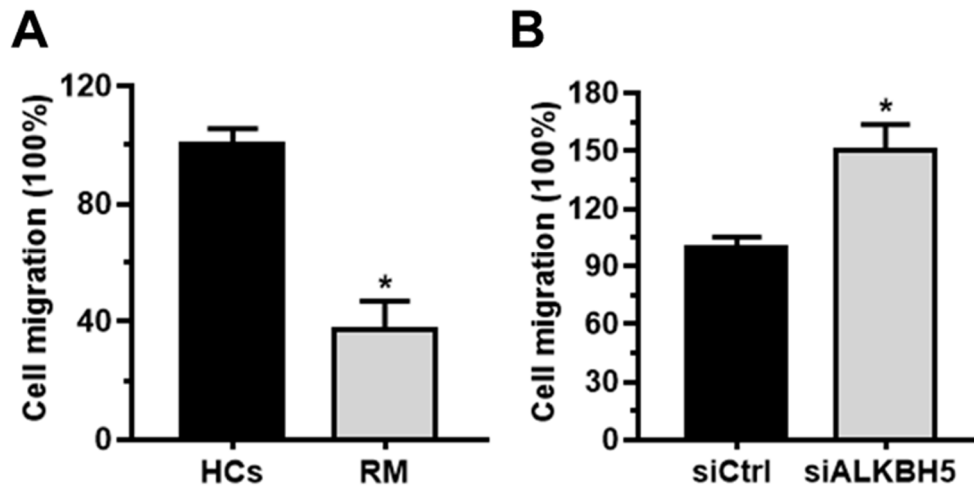

**Figure S1:** (A) Extravillous explants were obtained from HCs and RM patients at 6-10 weeks of gestation and cultured on Matrigel. Serial pictures of the explants were taken under a light microscope after 24 h and 72 h of culture in vitro. Statistical assay of the migration distance of villous tips (%). Data are presented as means  $\pm$  SD of three independent experiments. (B) Extravillous explants from RM patients at 6-10 weeks of gestation were maintained in culture on Matrigel. Serial pictures of the explants transfected with siALKBH5 or siCtrl were taken under a light microscope after 24 h and 72 h of culture in vitro. Statistical assay of the migration distance of villous tips (%). Data are presented as means  $\pm$  SD of three independent experiments.

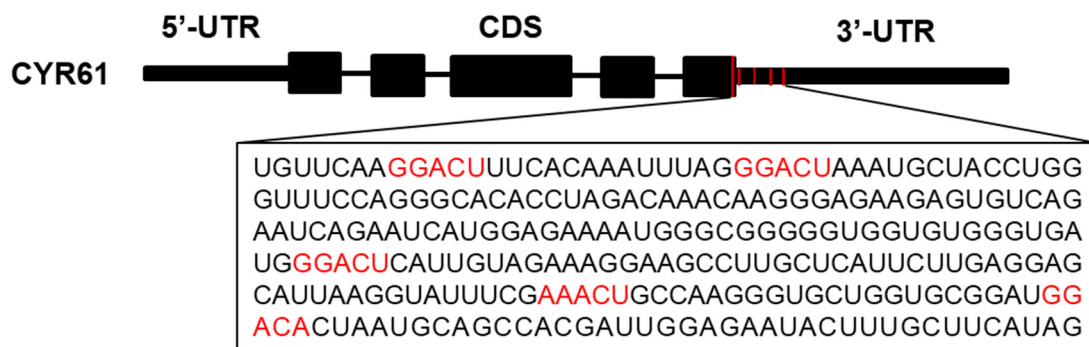

**Figure S2:** Schematic representation of the position of m<sup>6</sup>A motifs (RRACH) within *CYR61* mRNA.

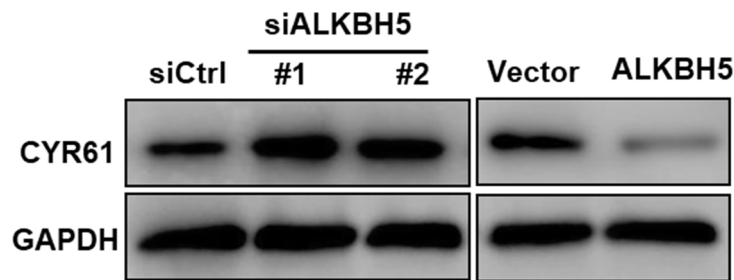

**Figure S3:** Western blotting analysis of CYR61 expression in JEG-3 cells transfected with siCtrl, siALKBH5 #1, siALKBH5 #2, control vector, or ALKBH5-expressing plasmid after 48 h.

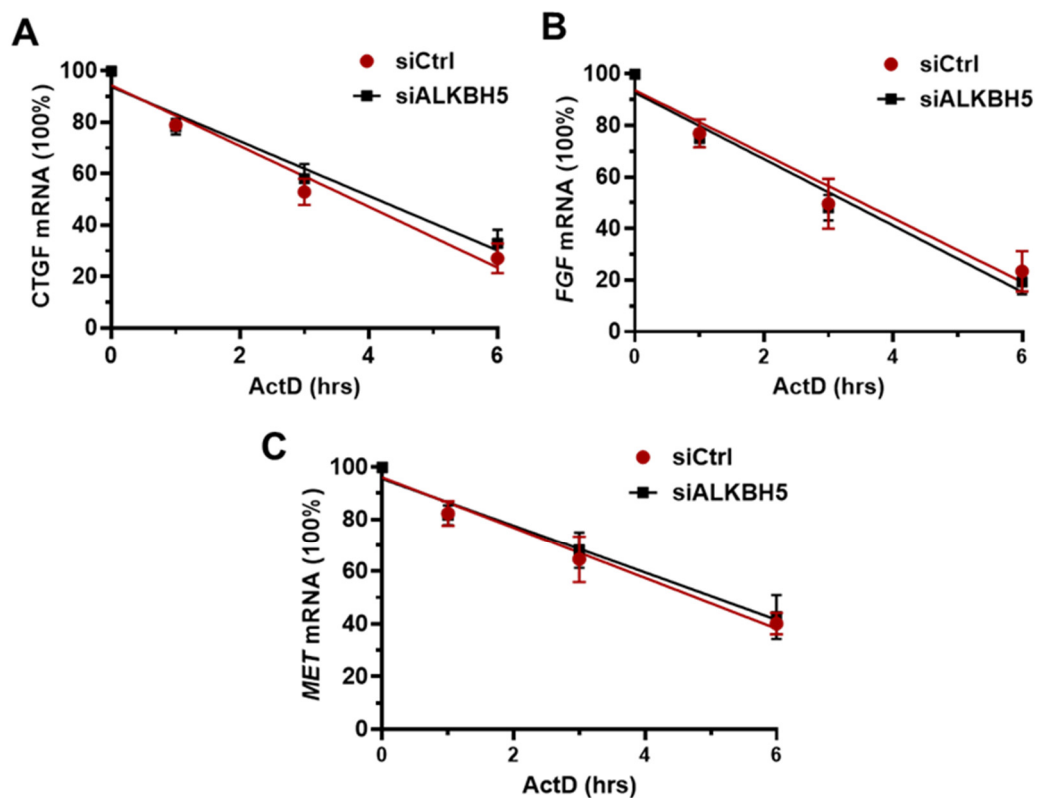

**Figure S4:** HTR-8 cells were transfected with siCtrl or siALKBH5 for 36 h; a time course for RNA stability was initiated by adding an RNA-Polymerase II inhibitor [actinomycin D (5

μg/mL)]. Cells were harvested at the indicated time points. Gene expression levels were normalized to that at “0 h”, and *GAPDH* was used as the reference gene. The results are shown as the mean of at least three independent experiments. \* $P < 0.05$  compared with the vector or siCtrl.

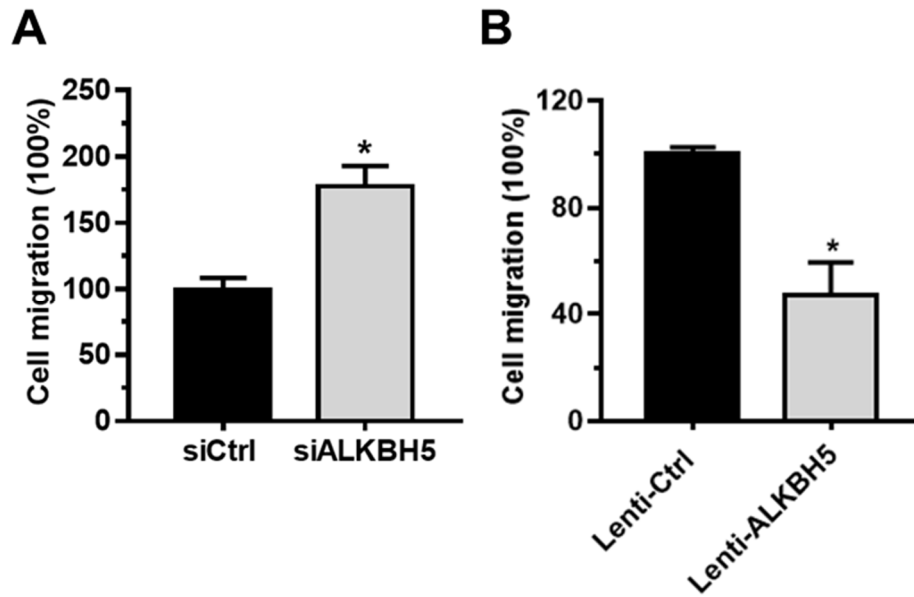

**Figure S5:** (A) Extravillous explants from HC at 6-10 weeks of gestation were maintained in culture on Matrigel. Serial pictures of the explants transfected with siALKBH5 or siCtrl were taken under a light microscope after 24 h and 72 h of culture in vitro. Statistical assay of the migration distance of villous tips (%). Data are presented as means  $\pm$  SD of three independent experiments. (B) Extravillous explants were obtained from HCs at 6-10 weeks of gestation and cultured on Matrigel. Serial pictures of the explants transfected with lenti-Ctrl or lenti-ALKBH5 lentivirus were taken under a light microscope after 24 h and 72 h of culture in vitro. Statistical assay of the migration distance of villous tips (%). Data are presented as means  $\pm$  SD of three independent experiments.

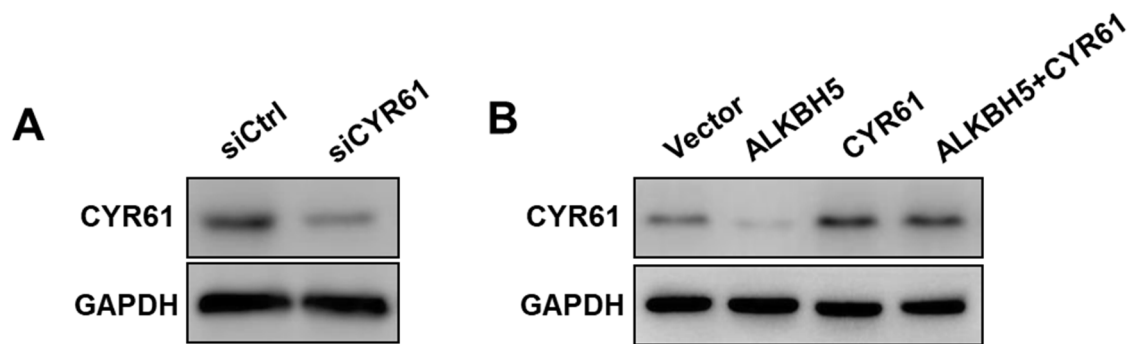

**Figure S6:** (A) Western blotting analysis of CYR61 expression in HTR-8 cells were transfected with siCtrl or siCYR61 after 48 h. (B) Western blotting analysis of CYR61 expression in HTR-8 cells transfected with control vector, ALKBH5-, CYR61 or ALKBH5+CYR61-expressing plasmid after 48 h.

### **Supplementary Primer:**

#### **Real-time PCR primer:**

METTL3 F: GCAGGCTCAACATACCCGTACT  
METTL3 R: GATGCGTTGCAGTTGATTTGTCT  
METTL14 F: ACTCTACCATGAGGAATGCAGAT  
METTL14 R: CCCATCTGGCTTGATGTAGTCT  
WTAP F: GGAAGGTGAACTGGAACAGACT  
WTAP R: GCCTTCCAAGCTCTTGATTCT  
YTHDF2 F: GGATCTGTACATCAAAGGATGGAT  
YTHDF2 R: GCTCAGCTGTCCATAAGAAGTTAAGT  
YTHDC1 F: AGATGGGTCTGTCAGATCTGGT  
YTHDC1 R: TCTGAACCTGCATATGACTCTGAT  
FTO F: GCTGGCATCATGATGAAAATCT  
FTO R: TGTGTCTCTATGTCCCATGAGATCT  
ALKBH5 F: TCACTGCATACGGCCTCAGGACAT  
ALKBH5 R: TTAGAGCAGGGTCCCTGTTGT  
RBM15 F: CAGGGACCTTTATCCTGACTCT  
RBM15 R: GCAGATCTCGATCACCTCTGT  
ZC3H13 F: ATGCAACAGGGATCGAGATAGAT  
ZC3H13 R: TCTGTCTCTGTCTCTGTCCCTGT  
YTHDF1F: CAAGCACACAACCTCCATCTTCG  
YTHDF1R: GTAAGAACTGGTTCGCCCTCAT  
WTAP F: GTACAAGCTTTGGAGGGCAAGT  
WTAP R: TGGACTTGCTTGAGGTACTGGA  
METTL16 F: ACAGAAGACACTCCTGATGG  
METTL16 R: TTAACAGAACTAGGCGGAGG  
FN1 F: ATAGGTGAGGAAATCCAAATTGGT  
FN1 R: CTGTACTCAGAAGTGTCCTGGAAT  
TPM4 F: ACGAGGAGGTAGCTCGTAAGCT  
TPM4 R: GTTCTTCTTCCAGGTCACACAT  
SUMO3: CGTCCTCTCTTTGATGTACTTCAAGT  
SUMO3: GTACCCACAATATCTTGCAACTCAT  
FGF1 F: AAAGAGTACCGAGACTGGCCAGT  
FGF1 R: TGTAATGGTTCTCCTCCAGCCT  
CTGF F: AAGCTGACCTGGAAGAGAACAT  
CTGF R: CTCCACAGAATTTAGCTCGGTAT  
MET F: TGCAAGAACTGTATGCTGGAT

MET R: ATTATCCACTTCACTGGCAGCT  
CYR61 F: CTTACGCTGGATGTTTGAGTGT  
CYR61 R: AGACTGGATCATCATGACGTTCT  
COL5A2 F: GTGATGACCTAAAGCTTTGCCAT  
COL5A2 R: CAGGTTTTACGTGGTACACTGGAT  
CAV1 F: ACCACCTTCACTGTGACGAAAT  
CAV1 R: GCATGGTACAACCTGCCCAGAT  
YY1 F: AGAATAAGAAGTGGGAGCAGAAGC  
YY1 R: ACGAGGTGAGTTCTCTCCAATGAT  
CGB F: AAAGGAGCGCCATGGATTAC  
CGB R: CCATTACTGTGACCCTGTTA  
GAPDH F: CACTGGGCTACACTGAGCAC  
GAPDH R: AGTGGTCGTTGAGGGCAAT
